# Abundance and diversity of the fecal resistome in slaughter pigs and broilers in nine European countries

---

Patrick Munk<sup>1</sup>, Berith Elkær Knudsen<sup>1</sup>, Oksana Lukjachenko<sup>1</sup>, Ana Sofia Ribeiro Duarte<sup>1</sup>, Roosmarijn E.C. Luiken<sup>2</sup>, Liese Van Gompel<sup>2</sup>, Lidwien A.M. Smit<sup>2</sup>, Heike Schmitt<sup>2</sup>, Alejandro Dorado Garcia<sup>2</sup>, Rasmus Borup Hansen<sup>3</sup>, Thomas Nordahl Petersen<sup>1</sup>, Alex Bossers<sup>2,4</sup>, Etienne Ruppé<sup>5</sup>, [EFFORT GROUP], Ole Lund<sup>1</sup>, Tine Hald<sup>1</sup>, Sünje Johanna Pamp<sup>1</sup>, Håkan Vigre<sup>1</sup>, Dick Heederik<sup>2</sup>, Jaap A. Wagenaar<sup>4,6</sup>, Dik Mevius<sup>4,6</sup>, Frank M. Aarestrup<sup>1\*</sup>

1 Research group for Genomic Epidemiology, National Food Institute, Technical University of Denmark. Kemitorvet 204, 2800 Kongens Lyngby, Denmark.

2 Institute for Risk Assessment Sciences, Utrecht University. Yalelaan 2, 3584 CM Utrecht, Netherlands.

3 Intomics A/S. Diplomvej 377, 2800 Kongens Lyngby, Denmark.

4 Wageningen Bioveterinary Research. PO box 65, 8200AB Lelystad, The Netherlands.

5 Genomic Research Laboratory, Hôpitaux universitaires de Genève. Rue Gabrielle-Perret-Gentil 4, 1205 Geneva, Switzerland.

6. Dept. Infectious Diseases and Immunology, Faculty of Veterinary Medicine, Utrecht University. Yalelaan 1, 3584 CL Utrecht, the Netherlands.

## **EFFORT group:**

Haitske Graveland, Alieda van Essen, Bruno Gonzalez-Zorn, Gabriel Moyano, Pascal Sanders, Claire Chauvin, Julie David, Antonio Battisti, Andrea Caprioli, Jeroen Dewulf, Thomas Blaha, Katharina Wadepohl, Maximiliane Brandt, Dariusz Wasyl, Magdalena Skarzyńska, Magdalena Zajac, Hristo Daskalov, Helmut W Saatkamp, Katharina D.C. Stärk.

## 1 **Abstract**

2 Antimicrobial resistance (AMR) in bacteria and associated human morbidity and mortality is increasing. Use  
3 of antimicrobials in livestock selects for AMR that can subsequently be transferred to humans. This flow of  
4 AMR between reservoirs demands surveillance in livestock as well as in humans. As part of the EFFORT  
5 project ([www.effort-against-amr.eu](http://www.effort-against-amr.eu)), we have quantified and characterized the acquired resistance gene  
6 pools (resistomes) of 181 pig and 178 poultry farms from nine European countries, generating more than  
7 5,000 gigabases of DNA sequence, using shotgun metagenomics. We quantified acquired AMR using the  
8 ResFinder database and a database constructed for this study, consisting of AMR genes identified through  
9 screening environmental DNA. The pig and poultry resistomes were very different in abundance and  
10 composition. There was a significant country effect on the resistomes, more so in pigs than poultry. We  
11 found higher AMR loads in pigs, while poultry resistomes were more diverse. We detected several recently  
12 described, critical AMR genes, including *mcr-1* and *optrA*, the abundance of which differed both between  
13 host species and countries. We found that the total acquired AMR level, was associated with the overall  
14 country-specific antimicrobial usage in livestock and that countries with comparable usage patterns had  
15 similar resistomes. Novel, functionally-determined AMR genes were, however, not associated with total  
16 drug use.

17

## 18 **Introduction**

19 Antimicrobial resistance (AMR) is considered one of the largest threats to human health.<sup>1</sup> In addition to the  
20 use of antimicrobial agents for humans, livestock is considered an important source of AMR, potentially  
21 compromising human health.<sup>2</sup> Besides AMR in zoonotic pathogens, AMR in commensal bacteria is  
22 worrisome because of its ability to spread horizontally to pathogens.

23 Multiple studies have shown that use of antimicrobials in livestock will lead to increased occurrence of AMR  
24 and that reduction of usage will eventually lead to reduced resistance.<sup>3-8</sup> A number of national surveillance  
25 programs have been implemented to monitor the occurrence of AMR in different reservoirs and follow  
26 trends over time.<sup>1,9-11</sup> There are major differences in antimicrobial consumption patterns between different  
27 countries globally and also within Europe.<sup>12</sup> Major differences in the occurrence of AMR have also been  
28 observed among indicator organisms (e.g. *E. coli*) isolated from different European countries.<sup>3,13</sup> Current  
29 monitoring efforts are mainly based on culturing indicator bacteria followed by phenotypic AMR  
30 determination.<sup>13,14</sup> This procedure only targets a limited number of species present in the gut microbiota

31 and thus likely represents only a fraction of its resistome (the collective pool of AMR genes). Such  
32 metagenomic approaches have been used in a number of recent studies and it has been shown that  
33 metagenomic read mapping describes AMR abundance in bacterial communities more accurately than  
34 commonly used technologies on selected indicator organisms.<sup>15-17</sup> A recent study focused on sampling a  
35 diverse group of individual pigs from eleven farms in three countries showed that genetics, age, diet and  
36 country all likely influence the pig microbiota, but little information is available for poultry.<sup>16</sup>

37 As part of the EU-funded EFFORT project ([www.effort-against-amr.eu](http://www.effort-against-amr.eu)), we sampled over 9000 animals in  
38 181 pig and 178 poultry herds in nine European countries, generating herd-level composite samples as  
39 previously described.<sup>17</sup> This gives us a unique insight into the diversity and structure of the acquired pig and  
40 broiler resistomes across Europe. We sampled animals as close as possible to slaughter to elucidate the  
41 potential consumer exposure to AMR associated with meat production in Europe. Association between  
42 AMR gene abundance and country level antimicrobial usage was analyzed. We hereby provide an overview  
43 of AMR in the two most intensively raised European livestock species. To our knowledge, this study  
44 represents the single largest metagenomic AMR monitoring effort of livestock: both in terms of countries  
45 (9), herds included (359), individual animals sampled (over 9,000) and sequencing effort (5,000+ gigabases).

46

## 47 **Methods**

### 48 **Farm selection and sampling**

49 The sampling protocol for pig and broiler farms that has been agreed on by the EFFORT consortium is  
50 described below. Selection of farms and sampling procedure followed these guidelines to the extent  
51 possible, but some deviations from the protocol were occasionally necessary. A detailed description of the  
52 sampling conducted in the individual countries is provided in supplementary material.

### 53 **Selection of pig and poultry farms**

54 In each participating country, 20 conventional integrated pig farrow-to-finisher non-mixed farms were  
55 selected. The farms needed to have a minimum of 150 sows and 600 fatteners and employ batch  
56 production to ensure that the majority of the animals of the sampled group originated from the same birth  
57 cohort. All-in all-out production at compartment level was preferred and all fatteners sampled were  
58 required to have been on the same site during their entire life. Selected farms should have no contact  
59 through livestock trade, and have a random regional distribution.

60 In each country, 20 conventional broiler farms (no breeders) were selected. The farms should have all-in all-  
61 out production, with a thinning procedure from day 30 onwards allowed. All selected farms should have no  
62 intended slaughter age higher than 50 days, no slow growing breeds (intended growth rate less than 55  
63 gram/day) and no stocking density lower than 10 birds/m<sup>2</sup>. Only one flock/house per holding should be  
64 sampled and the flock should be between 20,000 and 40,000 birds. If possible, selected farms should have  
65 a random regional distribution.

### 66 **Procedure for sampling**

67 We sampled pig farms between May 2014 and December 2015, and tried to minimize seasonal influences.  
68 The sampled fatteners should be as close to slaughter as possible (i.e. within the last week). A total of 25  
69 fresh, still warm and undisturbed fecal droppings were sampled from pen floors (a minimum of 10 g of  
70 feces per sample) randomly divided over all eligible compartments/stables of fatteners close to slaughter.

71 Broilers were sampled between May 2014 and June 2016, and we tried to minimize seasonal influences. On  
72 each farm, 25 undisturbed, fresh main bowel droppings were collected from the floor of the house (a  
73 minimum of 3 g feces per sample). The flocks should be sampled as close to slaughter as possible (last week  
74 before the final depopulation).

75 All samples were collected aseptically in plastic containers and were stored at 4°C and transported to the  
76 laboratory within 24 hours after sampling.

### 77 **Pooling and handling of samples**

78 Upon arrival in the laboratory, individual fecal samples were homogenized by stirring thoroughly with a  
79 sterile tongue depressor/ spoon for a few minutes. From each pig sample, two 2 ml cryotubes were filled  
80 and frozen immediately at -80°C (alternatively at -20°C for maximum 4 days, before transferring to -80°C).  
81 For broiler samples, at least 0.5 g feces was added to two cryotubes. Sample pooling was either done  
82 immediately or the frozen tubes were shipped to the Technical University of Denmark (DTU) on dry ice for  
83 pooling. Individual samples from the same herd were defrosted and placed on ice briefly before weighing.  
84 Following weighing, they were pooled with 0.5 g of feces from each sample and stirred for a few min with a  
85 sterile device (e.g. disposable wooden tong depressor). All samples were only thawed once shortly before  
86 DNA extraction.

87 After removing two mis-labeled samples, we ended up with composite fecal samples from 178 broiler  
88 flocks and 181 pig herds.

## 89 **Sampling to estimate the effect of random sampling**

90 To study the potential effect of sampling randomness and the reproducibility of our sampling protocol, two  
91 of the pig herds were chosen for triplicate sampling. These two herds were sampled three times on the  
92 same day (25 samples x 3 sampling rounds), resulting in six pooled samples (2 herds x 3 sampling rounds),  
93 from which the within-farm variation was assessed. A table with all samples and their metadata is included  
94 as Supplementary Table 1.

## 95 **DNA extraction and sequencing**

96 From each of the pooled, herd-level fecal samples, DNA was extracted using a modified QIAamp Fast DNA  
97 stool mini kit protocol (Qiagen, cat. no. 51604), as previously described.<sup>18</sup> One major modification is the  
98 addition of a bead beating step in the beginning of DNA extraction. The protocol can be found at  
99 [https://figshare.com/articles/SOP\\_-\\_DNA\\_Isolation\\_QIAamp\\_Fast\\_DNA\\_Stool\\_Modified/3475406](https://figshare.com/articles/SOP_-_DNA_Isolation_QIAamp_Fast_DNA_Stool_Modified/3475406). DNA-  
100 purification of all pooled samples was processed centrally at Technical University of Denmark (DTU), and  
101 the DNA was stored in duplicates at -20°C until further use.

102 DNA was shipped on dry ice for library preparation and sequencing at the Oklahoma Medical Research  
103 Foundation (OMRF). There, DNA from all samples was mechanically sheared to a targeted fragment size of  
104 300bp using ultrasonication (Covaris E220evolution). For pooled pig samples, library preparation was  
105 performed with the NEXTflex PCR-free library preparation kit (Bioo Scientific). For poultry samples, due to a  
106 lower DNA availability, the minimal amplification-based KAPA Hyper kit (Kapa Biosystems) was used. For all  
107 samples, the Bioo NEXTflex-96 adapter set (Bioo Scientific) was used. In batches of roughly sixty samples,  
108 the libraries were multiplexed and sequenced on the HiSeq3000 platform (Illumina), using 2x150bp paired-  
109 end sequencing per flow cell. A total of 17 Belgian, Danish and Dutch pig fecal samples were sequenced on  
110 the HiSeq2500 platform (Illumina), using 2x100bp paired-end sequencing, before converting to HiSeq3000  
111 for the remaining samples (See Supplementary Table 1).

## 112 **Bioinformatics processing**

113 The FASTQ files with sequencing data for each sample were analyzed following the principles from the  
114 previously described MGmapper tool.<sup>15</sup> The reads were first cleaned by cleaning out adaptors using BBduk  
115 (BBMap v39.92 - Bushnell B. -<https://sourceforge.net/projects/bbmap/>), and by removing reads that  
116 aligned to the internal sequencing control phi-X174 as determined by the BWA-MEM algorithm.<sup>19</sup> Trimmed  
117 read pairs were aligned using the BWA-MEM algorithm Prokaryotic RefSeq genomes from NCBI GenBank  
118 (downloaded on Nov. 18, 2016) with the “reference” or “representative” genome tags. The BWA-MEM  
119 algorithm (v0.7.15) was slightly modified such that the insert size was estimated for the entire sample  
120 unaffected by the number of CPU cores used. This estimate was then used for re-analyzing the cleaned

121 read pairs using BWA-MEM, ensuring that the thresholds for a read pair to map as a 'proper pair' were the  
122 same for all read pairs, and avoiding bad insert size estimates when few read pairs aligned.

123 The read pairs were aligned to the bacterial NCBI genomes again, and to the AMR genes present in the  
124 ResFinder database (accessed Nov. 17, 2016).<sup>20</sup> ResFinder is a manually curated database of horizontally  
125 acquired AMR genes and thus does not include intrinsic AMR genes and mutated housekeeping genes  
126 providing AMR by changing the drug target. Technical duplicate read pairs were then removed using  
127 'MarkDuplicates' from the Picard command line tools (v2.8.3; <http://broadinstitute.github.io/picard/>).

128 For each ResFinder reference sequence, we counted the number of read pairs that properly aligned with at  
129 least 50 bp aligning from both the forward and reverse reads. Each read pair matching a ResFinder  
130 reference was assigned to the first highest-scoring reference, as done in MGmapper. The same was done  
131 for NCBI microbial genomes in order to quantify the bacteriome and get a measure of the microbial  
132 proportion within each sample. This total was used to normalize the ResFinder counts, by computing an  
133 FPKM-value (fragments per kilobase reference per million bacterial fragments) for each ResFinder  
134 reference sequence. The FPKM values were computed by dividing the mapping count on each reference  
135 with its gene length and the total number of bacterial read pairs for the samples and multiplying by  $10^9$ .<sup>21</sup>  
136 Raw mapping count data and their associated FPKM values can be found in Supplementary Table 2 and 3.

137 Because ResFinder contains many representatives of certain gene families, a high degree of homology  
138 exists, with long stretches of the references being identical. This causes unspecific mapping between high-  
139 identity sequences. To eliminate this random noise, we chose to aggregate read counts and relative  
140 abundances post-mapping at higher levels based on sequence identity. We clustered all the ResFinder  
141 genes using CD-HIT-EST (v4.6.6) at a 90% identity level and otherwise default settings.<sup>22</sup> The resulting gene  
142 clusters were manually inspected and named to reflect their contents while avoiding conflicts with other  
143 clusters (Supplementary Table 4). Abundances were aggregated according to these clusters of high-identity  
144 genes and the resistance-class-level as annotated in ResFinder. These two levels, "gene" and "class", were  
145 used for all downstream analysis.

#### 146 **Functional resistance database**

147 Previous studies have identified a wide array of novel AMR genes in various reservoirs using functional  
148 metagenomics, referred to as functional AMR genes.<sup>23–26</sup> By cloning random DNA fragments from complex  
149 microbiomes into an expression vector expressed in a host (typically *E. coli*) and selecting for growth in the  
150 presence of certain antibiotics, they have been found to provide AMR to many antibiotics.<sup>23–26</sup> We

151 constructed a functional resistance database (FRD) from 3,416 AMR gene variants identified in four major  
152 studies, using 23 different antimicrobials for selection.<sup>23–26</sup>

153 Briefly, in each of these studies, DNA was extracted from environmental and human fecal samples,  
154 fragmented and cloned into a plasmid vector and screened for AMR functionality in *E. coli* cultured with  
155 one of multiple antimicrobials. AMR-granting plasmid inserts were then sequenced and the responsible  
156 open reading frame was identified. The protocol for the database construction can be found at  
157 <https://cge.cbs.dtu.dk/services/ResFinderFG/>. Genes were quantified using MGmapper as was done for  
158 ResFinder. Genes with more than 90% identity to ResFinder genes were removed post mapping to obtain  
159 the new AMR genes without overlap with ResFinder. The resulting data was aggregated to 90% gene  
160 clusters, using CD-HIT-EST, as was done for ResFinder.<sup>22</sup> The most frequent gene clusters remaining were  
161 derived from genes selected using: trimethoprim, chloramphenicol, co-trimoxazole, cycloserine, amoxicillin,  
162 gentamicin, penicillin and tetracycline.

### 163 **Principal coordinate analysis and resistome clustering**

164 For principal coordinate analysis (PCoA), the gene-cluster level FPKM matrix was Hellinger-transformed and  
165 the Bray-Curtis (BC) dissimilarities between all samples were calculated using the R package *vegan*.<sup>27</sup> PCoA  
166 was carried out for both pigs and poultry; combined and separately, using the *vegan* function ‘betadisper’.  
167 The same analysis was used to test whether host animal and country were significant predictors of within-  
168 group beta diversity dispersion. The effects of country on sample dissimilarities was determined using  
169 ‘permutational multivariate analysis of variance using distance matrices’ (‘adonis2’ function in *vegan*  
170 package), separately for pig and poultry.

### 171 **Antimicrobial use in livestock**

172 Data for national livestock antimicrobial usage (AMU) was obtained from the European Medicines Agency’s  
173 2014 European Surveillance of Veterinary Antimicrobial Consumption (ESVAC) report and was stratified by  
174 major drug family.<sup>28</sup> The mass of active compound sold for use in animals in 2014 was divided by the  
175 Population Correction Unit (PCU) in 10<sup>6</sup> kg - approximating the biomass. The PCU is a unit that allows inter-  
176 species integration by adjusting for import/export and differences in average weight between species when  
177 they are most likely to receive antimicrobial treatment. The estimate was multiplied by 1000 to obtain drug  
178 mg/kg PCU livestock. The country-specific veterinary drug use can be found in Supplementary Table 5.

### 179 **Procrustes analyses**

180 In order to test the association between country-specific AMU patterns and the resistomes, we performed  
181 Procrustes analysis using the *vegan* R package as follows. A PCoA was generated from Euclidean distances



182 between the samples in the PCU-corrected AMU (Supplementary Table 5, Supplementary Figure 1). The  
183 AMU PCoA was tested against the previously mentioned Hellinger-transformed, resistome BC dissimilarity  
184 PCoA using the 'protest' function with the default 999 permutations, again separately for pigs and poultry.  
185 The gene-cluster FPKM ResFinder matrix and the genus-level FPKM taxonomy matrix were Hellinger  
186 transformed and BC dissimilarities were calculated. They were ordinated using non-metric  
187 multidimensional scaling (NMDS) with the 'metaMDS' *vegan* function (999 permutations) for pig and  
188 poultry samples separately. The symmetric Procrustes correlation coefficients between the bacteriome and  
189 resistome ordinations, p-values and plots were obtained using the 'protest' and 'procrustes' functions in  
190 *vegan*.<sup>29</sup>

### 191 **Alpha diversity**

192 For all samples, we computed the within-herd resistome diversity using Simpson diversity index (1-D),  
193 Chao1 richness estimate and Pielou's evenness.<sup>30</sup> The raw read count matrix was rarified to 10,000 hits for  
194 all samples for alpha diversity estimation, leading to the exclusion of 10 samples.

### 195 **Visualization**

196 Heatmaps were produced using the *heatmap* R package. For heatmaps showing individual gene  
197 abundances, the BC dissimilarities between samples were used. For all other dendrograms, the Pearson  
198 product-moment correlation coefficients (PPMCC) were used. Complete-linkage clustering was used for all  
199 dendrogram clustering. For sample similarities, BC dissimilarity was converted to a similarity percentage,  
200 i.e.,  $100*(1- BC)$ .

201 The circular BC sample dendrogram was exported in Newick format using the *ape* package and further  
202 annotated with the Interactive Tree of Life tool.<sup>31,32</sup> Bar-, box- and scatter plots were produced using the  
203 *ggplot2* R library.<sup>33</sup> The R library *RcolorBrewer* was used to generate the color palettes used. The library is  
204 based on work by Cynthia A. Brewer ([www.ColorBrewer.org](http://www.ColorBrewer.org)).

### 205 **Statistical analyses**

206 All statistics was done in Microsoft R Open (MRO) 3.3.2, using the libraries and procedures detailed below.  
207 Exact package versions can be found here: <https://mran.revolutionanalytics.com/snapshot/2016-11-01/bin/windows/contrib/3.3/>. For statistical tests, only the first sampling from triple-sampled herds was  
208 included (see Supplementary Table 1). Unless otherwise mentioned, all statistical analyses were performed  
209 on pigs and poultry separately.  
210



## 211 **Effect of AMU on total AMR**

212 For testing the effect of total AMU on total metagenomic AMR abundance (sum of all genes), we used the  
213 *lme4* 1.1-12 package to make linear mixed effects regression models with total livestock drug usage as the  
214 independent variable, total AMR abundance (FPKM) as the dependent variable and country as a mixed  
215 effect intercept, adjusting for the fact that AMR abundance observed in farms from the same country is  
216 correlated due to factors that are not included in this study.<sup>34</sup> The effect of AMU was modelled on a  
217 logarithmic scale, which resulted in lower Akaike's information criteria compared with modelling AMU on a  
218 linear scale. Country- and sample-level residuals were plotted and inspected for normality and  
219 homoscedasticity. Pig sample residuals and country residuals were normal and so were poultry country  
220 residuals. Poultry sample residuals had a longer right tail. Square-root transforming the poultry AMR data,  
221 gave more normal residuals and a similar conclusion ( $p < 0.05$ ). The effect and significance of drug usage was  
222 assessed using likelihood-ratio tests, comparing the random effect models with and without the AMU  
223 effect.

## 224 **Differential abundance analysis**

225 To identify differentially abundant AMR genes per country, we analyzed the read pair mapping count  
226 matrix using the *DESeq2* package as previously recommended for metagenomic read count data.<sup>35,36</sup> This  
227 was done on the raw read pair matrix, following recommendations that rarefying is not warranted in  
228 metagenomic studies.<sup>36</sup> The read-pair count matrices for pigs and poultry were analyzed separately. The  
229 number of mapped bacterial pairs was divided by the minimum number of mapped bacterial pairs and was  
230 used as the size factor. For each gene, we used a two-sided Wald test to determine whether the fold  
231 change between countries differed from 0 and extracted all the country-versus-country results. P-values  
232 were adjusted for the false discovery rate (FDR) using the Benjamini-Hochberg approach and we used a  
233 significance threshold of  $\alpha: 0.05$ .<sup>37</sup>

## 234 **Core resistome**

235 The core resistomes determined here, were the set of AMR gene clusters with mapping read pairs in at  
236 least 95% of the samples. The core resistomes were determined separately for the pig and poultry  
237 reservoirs.

238

## 239 **Results**

240 In total, DNA from 365 pooled samples was extracted and shotgun sequenced, resulting in more than 36  
241 billion sequences (18 billion paired-end (PE) reads), comprising more than 5 terabases of DNA. This yielded

242 an average of 50 million (SD:  $18 \times 10^6$ ) PE reads per pooled sample. This was similar for pig and poultry  
243 samples, though the former varied more than the latter.

244

#### 245 **Acquired resistome characterization**

246 The total AMR gene level varied significantly across samples, both depending on host animal and country of  
247 origin. In general, pigs had a higher AMR level than poultry (Figure 1a). The highest AMR levels were found  
248 in Italian pigs from where the top four resistance-scoring samples originated, all in excess of 10,000 FPKM  
249 AMR. At the lower end of the spectrum were Danish poultry samples that occupied the eleven samples  
250 with least AMR, all below 500 FPKM.

251

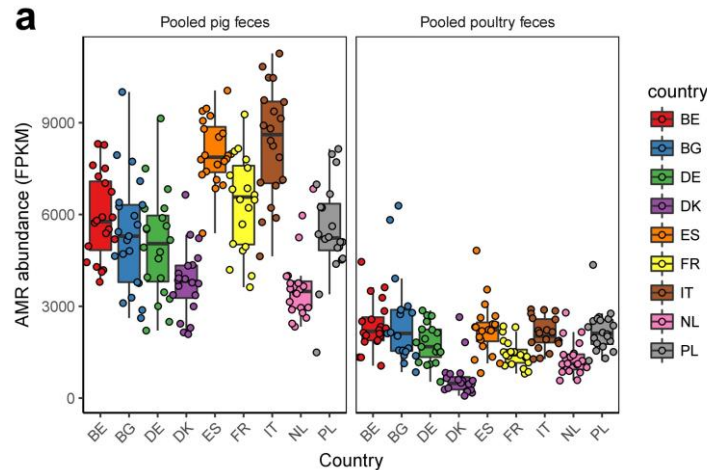

252

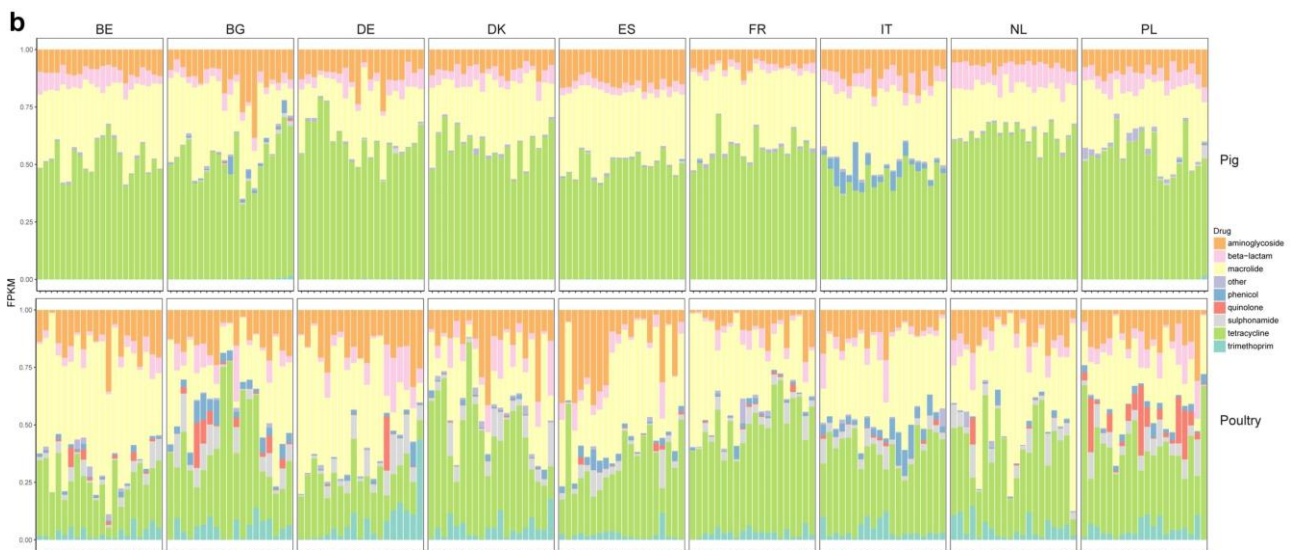

253

254 **Figure 1. Overview of AMR abundance and composition.** From the read mapping results to the ResFinder database, AMR  
255 abundance was calculated for each reference gene in each sample. (a) Boxplots showing the total AMR level per sample,  
256 stratified by host species and country. Each herd is also represented by a dot with sideways jitter to minimize overplotting.  
257 Horizontal box lines represent Q1, median and Q3. Whiskers denote range of points within  $Q1-1.5*IQR$  and  $Q3+1.5*IQR$ . (b)  
258 Stacked bar chart of AMR abundance per type (colors) per sample (x-axis), proportional to total AMR within each sample.

259 We summed the relative abundance of AMR to the corresponding drug class level for each sample to look  
260 for major trends across species and countries (Figure 1b). When considering the proportion of the total  
261 resistome that each AMR type takes up, the pig samples were relatively homogenous: tetracycline AMR  
262 was by far the most common, followed by macrolide AMR. Beta-lactam and aminoglycoside AMR genes  
263 followed with other kinds of AMR being rare. Italian pigs had a notably larger proportion of phenicol AMR  
264 compared with other countries and it seemed to be consistent across all Italian farms. A subset of Bulgarian  
265 pig farms had a similar proportion of phenicol AMR.

266 Among the poultry farms, there was less consistency: both within and between countries, the relative  
267 proportions of AMR per drug class varied more. Tetracycline, macrolide, beta-lactam and aminoglycoside  
268 AMR made up the majority of AMR, as in pig samples, but the two latter classes had very minimal  
269 contributions in a subset of herds. Sulfonamide and trimethoprim AMR were more abundant in poultry  
270 samples compared with pig samples, across all countries. In many Polish poultry herds, quinolone AMR  
271 made up a sizeable fraction of the combined resistome. This was also true for a few non-Polish herds,  
272 notably in Bulgaria. For non-proportional graphical representations of the AMR load stratified by sample  
273 and drug class, see the supplementary material for an unscaled, stacked bar chart (Supplementary Figure 2)  
274 and a heatmap (Supplementary Figure 3). Class level AMR relative abundances can be found in  
275 Supplementary Table 6.

276 To characterize the individual components of the resistome, we summed relative abundance to the gene-  
277 cluster level as we had done at drug class level. We found evidence for 407 different gene clusters across all  
278 pig and poultry samples (Supplementary Table 2).

279 We calculated the BC dissimilarities between all samples' gene-level resistomes and visualized it in a  
280 dendrogram (Figure 2a). There was a perfect host separation, with all pig samples clustering separately  
281 from all poultry, suggesting pig and poultry resistomes are very different. Within the pig cluster, the  
282 country separation was more pronounced than for poultry. An exception was Danish poultry, where 18/20  
283 samples clustered.

284 To assess the reproducibility of our protocol, from sampling through sequencing, we evaluated the  
285 similarities between resistomes of two triple-sampled swine herds. Dutch triple-sampled herd pools had  
286 the highest similarities of all samples, ranging from 93.6% - 93.7% BC similarity. The Belgian triple-sampled  
287 herd pools had values ranging from 91.5% - 93.3% similarity. No replicated sample pool had higher  
288 similarity to other herds than to its own replicates and the two sets of three samples can thus be seen  
289 clustering as expected (Figure 2a). A sample similarity heatmap is found in Supplementary Figure 4.

290

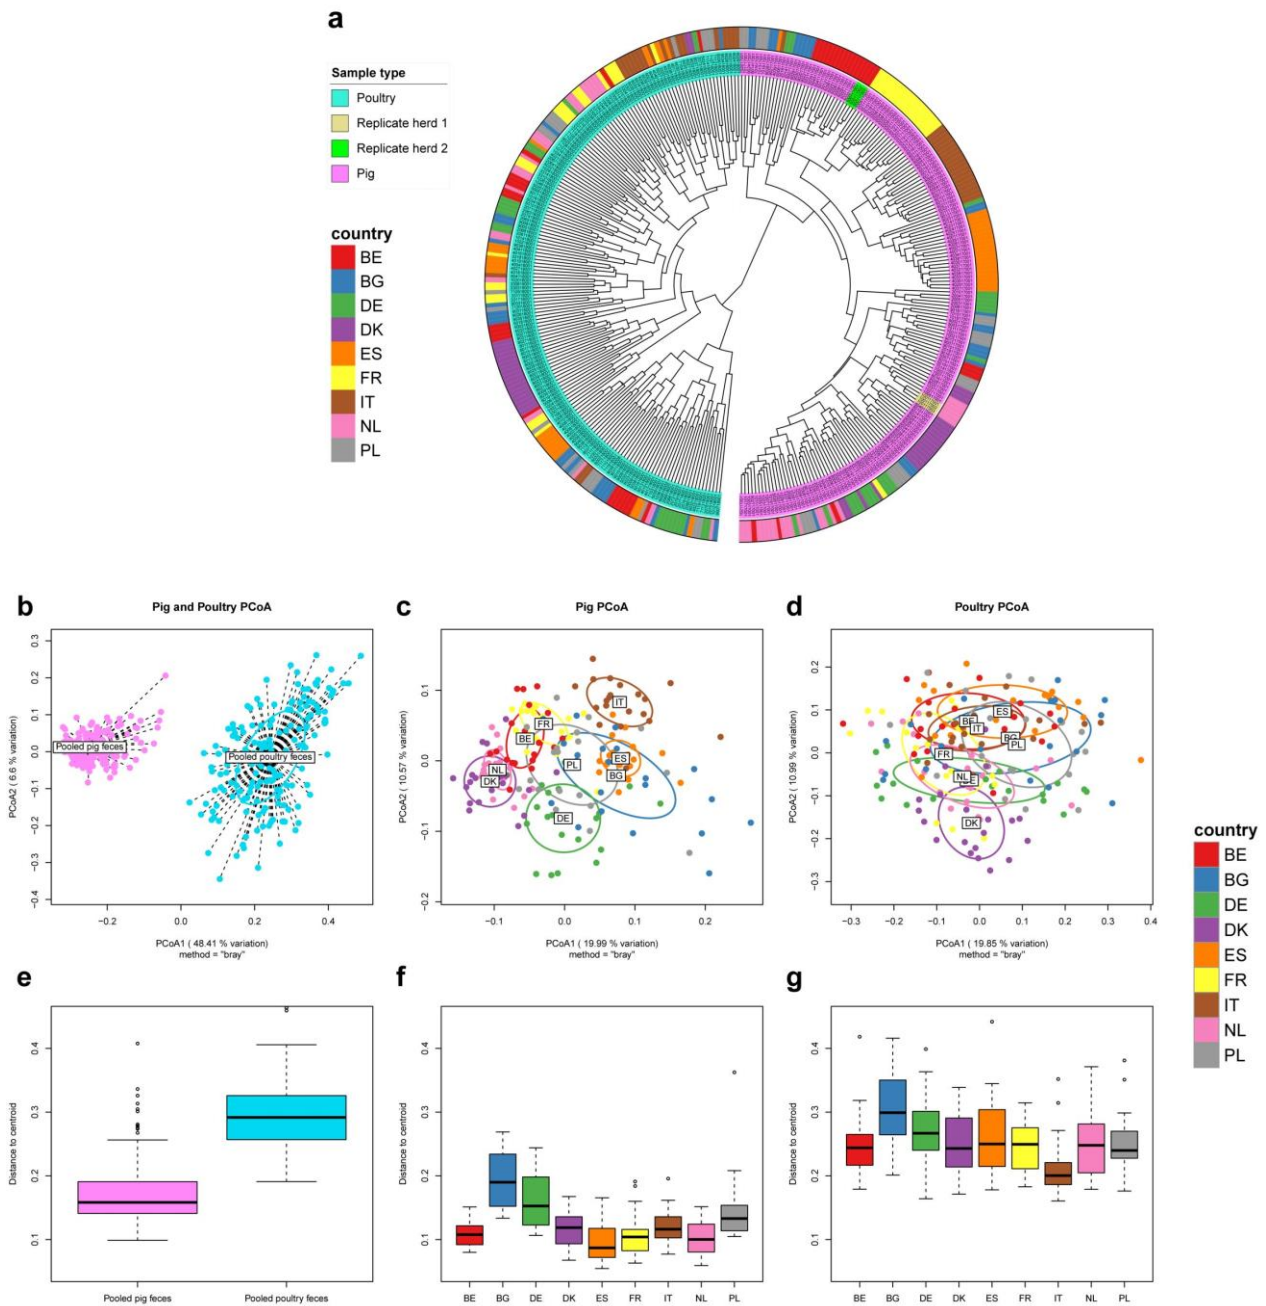

291

292 **Figure 2. Resistome clustering is influenced by both host animal and country. (a) Dendrogram showing complete linkage**  
 293 **clustering of BC dissimilarities between all pig and poultry resistomes. Triple-sampled pig herds are highlighted in separate**  
 294 **colors. (b-d) PCoA plots for pig and poultry samples combined (b), pig samples (c) and poultry samples (d), respectively. Ellipses**  
 295 **denote standard deviation for distance of each member to its group centroid (labeled). (e-g) Boxplots of distances for each**  
 296 **group's samples to its centroid for pig and poultry samples combined (e), pig samples (f) and poultry samples (g), respectively.**  
 297 **Horizontal box lines represent Q1, median and Q3. Whiskers denote range of points within  $Q1-1.5*IQR$  and  $Q3+1.5*IQR$ .**

298

299 We ordinated the gene-level resistomes for all samples (Figure 2b) and pig and poultry samples separately  
300 (Figure 2cd). As with hierarchical clustering, there was a clear separation of pig and poultry samples, along  
301 the first principal coordinate, which explained 48% of the variation across all resistomes.

302 When analyzing the two reservoirs separately, we observed clustering according to country of origin in pigs  
303 (Figure 2c), while clustering was more diffuse for poultry (Figure 2d). We tested for the country effect and  
304 found it to be significant in both pigs (adonis2  $p < 0.001$ ) and poultry (adonis2  $p < 0.001$ ). In poultry however,  
305 the country effect only explained roughly a quarter of the variation, while country explained roughly half of  
306 the variation in pigs (data not shown). In the pig resistome ordination, the Danish and Dutch samples  
307 clustered closely together. The same could be seen for French and Belgian resistomes and to a lesser  
308 degree, Italian and Spanish samples. Bulgaria, Germany and Poland showed larger dispersions than the  
309 other countries. Poultry samples had a higher dispersion than pig samples (Figure 2e, beta-dispersion  
310  $p < 0.001$ ). Beta-dispersion levels varied significantly between countries in both pigs (Figure 2f, beta-  
311 dispersion  $p < 0.001$ ) and poultry (Figure 2g, beta-dispersion  $p < 0.001$ ).

312 We visualized the AMR gene abundances in a heatmap to look at the overall structure and composition of  
313 the resistomes and the co-occurrence of AMR genes (Supplementary Figure 5). Some AMR genes were  
314 more abundant in one species, while others, including *tet(W)* and *erm(B)* were ubiquitous in all samples, for  
315 both species. Among the pig samples, the Italian samples stood out: several chloramphenicol AMR genes,  
316 including *cat(pC194)*, *catP*, and *cat\_2*, were much more abundant in Italy, compared to the other countries,  
317 consistent with our inspection of AMR at class level (Figure 1). Several AMR genes known to be co-located  
318 indeed co-occurred across samples. The genes in the vancomycin AMR *VanA* cassette were co-located in a  
319 number of poultry samples. This was also true for the *VanB* cassette members, clustering together, but  
320 separately from *VanA*, showing ability to distinguish variants of homologous genes. As earlier indicated, the  
321 poultry samples showed less country-based clustering than pigs. An exception were the Danish poultry  
322 samples. These had noticeably lower abundance of many AMR genes that were widespread in other  
323 countries.

#### 324 **Core resistome**

325 To determine whether specific genes were unique to each of the host animals, we examined the set of AMR  
326 genes that was consistently observed within each animal species (evidence for it in 95% of samples). We  
327 identified 33 core AMR genes in pigs and 49 core AMR genes in poultry, with 24 being shared between the  
328 two hosts (Supplementary Figure 6). Hence, only nine AMR genes were pig-core genes without also being  
329 poultry-core genes. These included the genes making up the Van-G vancomycin cassette, *tet(C)*, *bla<sub>ACI</sub>* and



330 *cfxA*. Twenty- five AMR genes were poultry-core genes without also being pig-core genes and include the  
331 Enterobacteriaceae-associated *strAB*, *sul2*, *blaTEM* and *tet(A)* genes.

332

### 333 **Differential abundance analysis**

334 In order to test which specific genes differed in abundance between countries, we carried out a differential  
335 abundance analysis for ResFinder gene read pair counts. Heavy overrepresentation of low unadjusted p-  
336 values indicated a large effect of country in both in the pig and poultry datasets (Supplementary Figure 7).  
337 Of special interest was the newly characterized *Enterococcus*-associated linezolid-resistance gene *optrA*,  
338 that had a significantly higher abundance in Bulgarian poultry farms, compared with poultry farms in all  
339 other countries (FDR < 0.05) (Figure 3b). A single Spanish farm did, however, have even higher *optrA*  
340 abundance than any other farm. Among the pig herds, the *optrA* gene was more abundant in Bulgarian and  
341 Italian herds than anywhere else (except for two farms in Spain) (FDR<0.05).

342 The newly identified colistin-resistance gene *mcr-1* was significantly more abundant in Bulgarian and Italian  
343 poultry farms, compared with most other countries (FDR<0.05). France, Poland and Spain had intermediate  
344 levels, while Denmark, the Netherlands and Germany had the lowest levels (Figure 3b).

345 As previously noted from visual inspection of heatmaps, multiple chloramphenicol AMR genes including  
346 *cat(pC194)* were much more abundant in Italian pigs than other pigs. The ESBL *bla<sub>CTX-M</sub>* gene cluster 1 also  
347 showed country dependency, being significantly more abundant in poultry samples from Spain, Poland,  
348 Italy, France and Belgium than Germany (FDR<0.05). Differential abundance analysis results can be found in  
349 Supplementary Table 7 and 8 for pig and poultry respectively.



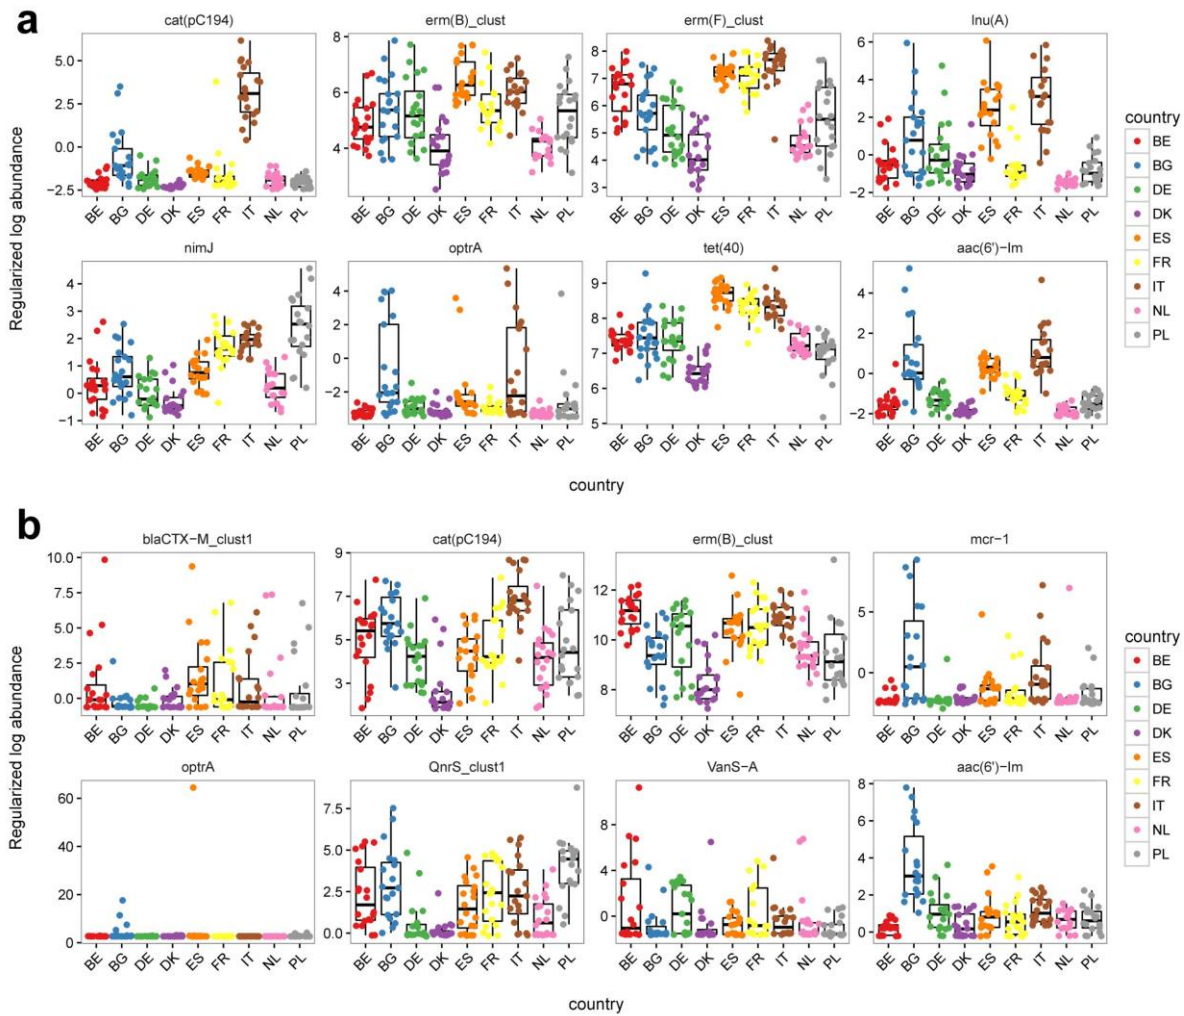

350

351 **Figure 3. AMR genes differ in abundance between countries. A handpicked subset of genes that differed significantly in**  
352 **abundance between at least two countries' pig farms (a) or poultry farms (b). The regularized log abundance (rlog) is shown on**  
353 **the y-axis in boxplots and points. Points were sideways jittered to reduce overplotting. Horizontal box lines represent Q1,**  
354 **median and Q3. Whiskers denote range of points within  $Q1-1.5*IQR$  and  $Q3+1.5*IQR$ .**

355

356

357

358

359

360

361

## 362 Alpha diversity and richness

363 We calculated several alpha diversity indexes for each farm resistome (Figure 4) The range of AMR diversity  
364 was generally much larger for poultry samples, having both lower and higher diversity than pig samples,  
365 which had a tighter spread of diversity. The poultry samples had a higher estimated richness than pigs (i.e.  
366 a higher number of unique AMR genes per sample). Alpha diversity indexes can be found in Supplementary  
367 Table 9.

368 Interestingly, countries with high AMR richness in pigs also tended to have high AMR richness in poultry.  
369 Spain had the highest median richness in both reservoirs, followed by Italy. Poland and Bulgaria together  
370 had the third and fourth highest AMR richness in pigs and poultry. Overall, the median estimated Chao1  
371 richness per country correlated significantly between the reservoirs (Spearman's rho: 0.88,  $p < 0.01$ ). This  
372 was neither true for evenness nor diversity ( $p > 0.05$ ). Rarefaction curves for pig and poultry resistomes can  
373 be found in Supplementary Figure 8.

374

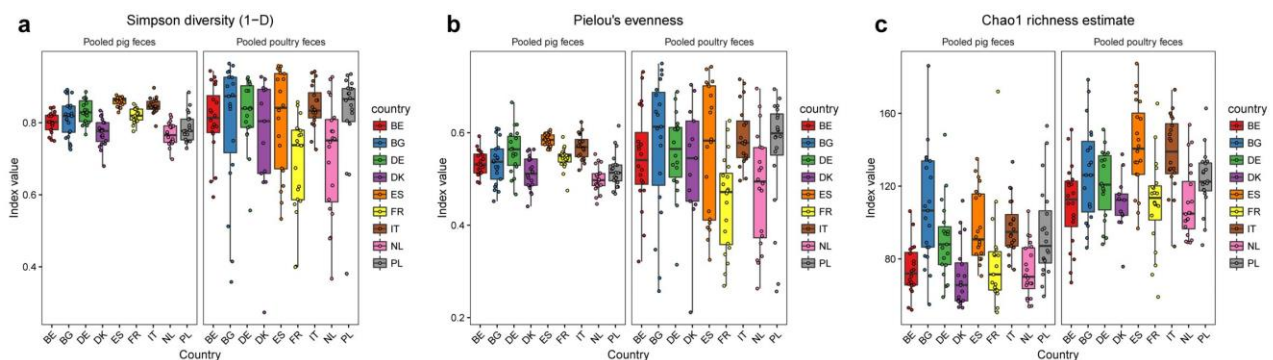

375

376 **Figure 4. Resistome alpha diversity and richness differs between animal host and countries. From the read count pair matrix,**  
377 **several indexes were calculated. (a) Simpson diversity index, (b) Pielou's evenness, and (c) the Chao1 richness estimate.**  
378 **Horizontal box lines represent Q1, median and Q3. Whiskers denote range of points within  $Q1-1.5*IQR$  and  $Q3+1.5*IQR$ .**

379

380

## 381 Association between bacteriome and resistome

382 To test the degree to which bacterial genus composition of the microbiota dictates the resistomes,  
383 Procrustes analyses were performed. We compared ordinations of the pig microbiome with the pig  
384 resistome and the poultry microbiome with the poultry resistome (Figure 5). We found that for both pig

385 and poultry, the bacterial composition correlated significantly with the resistome ( $p < 0.001$ ). Samples with  
386 similar taxonomic compositions thus tended to have similar resistome compositions.

387

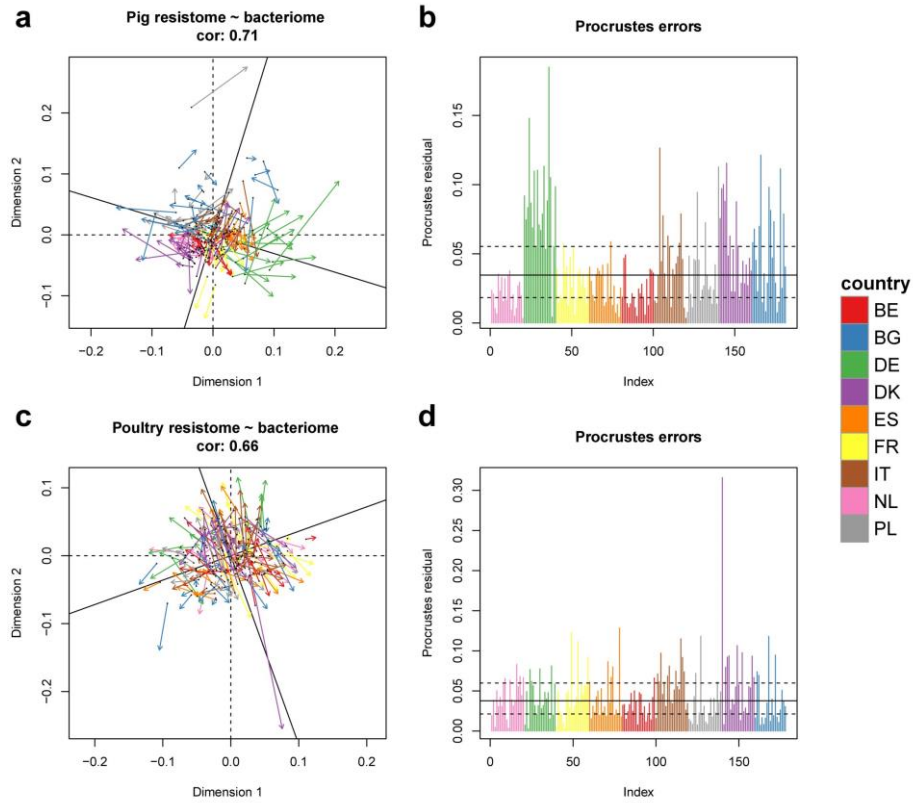

388

389 **Figure 5. Microbial composition dictates the resistome. Procrustes analysis plots for pig (a/b) and poultry (c/d). Procrustes**  
390 **rotations of bacterial composition onto their corresponding resistome composition (a/c). Bar charts of Procrustes residuals**  
391 **(b/d).**

392

393 The correspondence between the two datasets was slightly stronger in pigs (Procrustes symmetric  
394 correlation: 0.71) than in poultry (Procrustes symmetric correlation: 0.66). Interestingly, in pig samples we  
395 saw a country effect on the strength of association between the bacteriome and the resistome. In Dutch  
396 and Belgian pig herds, ordinations based on bacterial genera and AMR genes gave similar results (Figure  
397 5b). For samples from Bulgaria, Denmark, Italy and especially Germany however, the Procrustes residuals  
398 were larger. This was less evident for poultry, though a single Danish poultry herd had a very unusual  
399 resistome, considering its taxonomic composition (Figure 5d). Stress plots for NMDS can be found in  
400 Supplementary Figure 9.

401

## 402 AMR and drug use association

403 We found that the total country-level veterinary AMU was positively associated with AMR in both pigs and  
404 poultry. The AMR abundance increased by 1736-3507 (95% CI,  $\beta=2621$ ) FPKM in pigs when the AMU  
405 increased by 1  $\log_e$  unit (36.8% increase in AMU) (Figure 6a) and to a lesser degree in poultry, where the  
406 AMR abundance increase by 68 - 1330 FPKM (95% CI,  $\beta =700$ ) when the AMU increase 1  $\log_e$  unit (Figure  
407 6b). For pigs, the variance between farms within countries was 7 times larger than the variance between  
408 countries in general, whereas in poultry the variance was 4 times larger within-country than between  
409 countries.

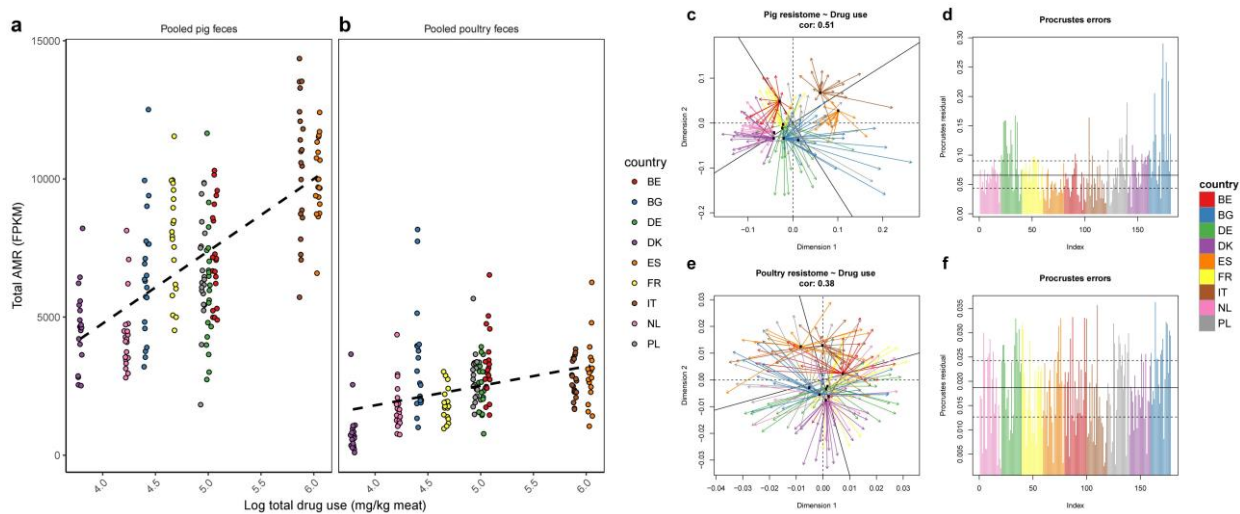

410

411 **Figure 6. National veterinary AMU affects total metagenomic AMR. (a-b) Scatter plots of country AMU and pooled sample total**  
412 **AMR. A slight sideways jitter was added to the points to minimize overplotting. Trend lines are shown for (a) pigs and (b)**  
413 **poultry. (c-f) Procrustes errors from rotation of resistome principal coordinate analysis (PCoA) onto country AMU PCoA (c-d) and**  
414 **poultry (e-f). (c/e) Procrustes rotations with arrows starting in AMU and ending in corresponding AMR ordination. (d/f) Line**  
415 **plots showing length of each residual arrow in Procrustes rotation.**

416

417 To test if the AMU pattern was associated with AMR gene profiles, we compared the AMR abundance  
418 matrix with AMU matrix, comprised of the 15 recorded AM classes (Supplementary Table 5). We found an  
419 association between the veterinary AMU pattern and the pig resistomes (Procrustes correlation: 0.51,  
420  $p < 0.001$ ) (Figure 6cd). The poultry resistomes were also significantly associated with AMU, albeit with a  
421 lower correlation, likely due to their larger beta-diversity and lower degree of country clustering  
422 (Procrustes correlation: 0.38,  $p < 0.001$ ) (Figure 6ef).

423

424

## 425 **Functional AMR genes**

426 In addition to using ResFinder, we also ran most analyses with the FRD database, to elucidate whether the  
427 functionally determined AMR genes behave similarly to the acquired AMR genes in ResFinder. If FRD genes  
428 serve similar AMR functionality as the acquired ResFinder genes, we would expect similar results.

429 Using the FRD database, we found both similar and different patterns, compared with using ResFinder.  
430 There was still a perfect separation between pig and poultry samples, but the country separation in pigs  
431 was less distinct than when using ResFinder (Supplementary Figure 10). Though less variation could be  
432 explained by two axes, the PCoA plot of pig samples now clustered German and Spanish samples, with the  
433 remaining countries being more similar. The resistome richness showed similar patterns to ResFinder:  
434 Spanish, Italian, Polish and Bulgarian samples had a higher estimated richness in both pig and poultry,  
435 compared to the other countries. The Procrustes correlation between the resistome and drug usage was  
436 lower (0.40 for pig and 0.25 for poultry). This result was echoed by the lack of association between total  
437 AMR and total AMU, for both pig and poultry ( $p > 0.05$ , Supplementary Figure 11).

438

## 439 **Discussion**

440 Using a metagenomic shotgun sequencing strategy, we were able to detect and quantify more than 400  
441 AMR genes across 181 pig and 178 poultry herds in 9 European countries.

442 A recent study including Chinese, Danish and French pigs showed the Chinese pig resistomes clustered  
443 separately, while Danish and French overlapped.<sup>16</sup> Here we demonstrate that even among European  
444 countries, the livestock resistomes differ in a country-specific manner that might be explained by  
445 differential AMU so that countries with similarly high and diverse AMU (Spain, Italy) have similar  
446 resistomes, the same way as countries with similarly low AMU (Denmark, Netherlands) also have similar pig  
447 resistomes.

448 We found that the beta diversity dispersion seems to be country dependent, particularly in pigs, with  
449 Bulgarian, German and Polish pig herds having more dispersed AMR. While we cannot currently explain  
450 this, we consider possible causes as differences in trade and management, among others.

451 We found the recently discovered plasmid-borne colistin resistance gene *mcr-1* in a number of poultry  
452 herds, especially in Bulgaria, Spain and Italy. Spain and Italy had the highest reported veterinary colistin  
453 usage among the surveyed countries, whereas Bulgaria has a low reported usage, uncharacteristic for the



454 high *mcr-1* level found here.<sup>13</sup> This gene was recently discovered in China and identified throughout the  
455 world and has been identified in pigs, poultry and human clinical infections alike.<sup>38</sup>

456 A newly characterized enterococcal linezolid-resistance gene, *optrA* was detected in a subset of pig  
457 samples, with Bulgaria, Italy and Spain having the highest abundances. The *optrA* gene provides AMR to  
458 both oxazolidinone and amphenicols, including the veterinary-used florfenicol.<sup>13,39</sup> The high abundance of  
459 this gene in these countries can likely be explained by the fact that they have the highest veterinary  
460 amphenicol usage (together with Croatia, which we did not sample) among the 26 countries surveyed by  
461 ESVAC.<sup>12</sup> This explanation fits well with the fact that Bulgaria, Italy and Spain also had the highest  
462 abundances of chloramphenicol AMR genes such as *cat(pC194)* in poultry.

463 Another AMR gene of special interest, the *bla*<sub>CTX-M</sub>, was also observed in the poultry herds. The higher  
464 abundance of *bla*<sub>CTX-M</sub> cluster 1 in Spain, Italy, Poland and Belgium, could possibly be explained by co-  
465 selection by fluoroquinolones, which is used more in Spain, Poland, Italy and Belgium than other sampled  
466 countries. *qnr* and *bla*<sub>CTX-M</sub> genes are frequently co-located on large ESBL plasmids. Veterinary  
467 cephalosporin usage did not seem to explain the observed levels.

468 Poland and Spain use far more fluoroquinolones veterinarily than other countries included in this study. We  
469 found that plasmid mediated quinolone AMR (*qnr*-genes) was frequently abundant in Polish, but not in  
470 Spanish, poultry. In Bulgaria, quinolone AMR was also frequently observed, although their reported AMU  
471 did not follow the same trend.

472 Interestingly, we observed that country-wise estimated AMR richness significantly correlated between pig  
473 and poultry. Also, the countries with a high AMR richness were also the ones with higher AMR abundance  
474 (Italy, Spain, Bulgaria and Poland). While having higher abundance of the ubiquitous core genes, these  
475 countries had a higher number of unique genes in both pig and poultry production. The fact that countries'  
476 AMR abundance and gene richness in pig and poultry tend to follow each other, could perhaps be explained  
477 with policy: if a country has strict AMU regulations in one livestock species, chances are that similar  
478 regulations are in place for other livestock species. Better host-separated, preferably herd-level, AMU data  
479 is needed to further explore this.

480

481 It has previously been reported that soil community composition structures the soil resistome.<sup>26</sup> Using a  
482 wide array of environmental matrices, including fecal and waste water samples, this has also been shown  
483 for human habitats.<sup>40</sup> We found the same to be true for pig and poultry resistomes, and additionally, we  
484 showed that the taxa-AMR association strength differs between countries. Horizontal gene transfer (HGT)

485 could explain this phenomenon, if a larger proportion of certain countries' resistome is mobile and AMR  
486 genes are more frequently introduced and re-introduced to genera. On the other hand, vertical AMR  
487 transmission can also play a role; if e.g. one country's livestock is more isolated from trade. This would  
488 mean more livestock generations for the microbiome and resistome to diverge from those in other  
489 countries.

490 The determination of a set of core AMR genes for pig and poultry likely represents an underestimate of the  
491 true core resistomes. Requiring a certain percentage of samples to show evidence for a gene does not  
492 account for differential sequencing depth. The core genes discovered here thus likely represent a  
493 conservative subset of the true core resistomes.

494 In contrast to ResFinder, when using FRD we found no relationship between total drug use and total  
495 functional AMR abundance. This suggests that while many genes can provide AMR when cloned into e.g. *E.*  
496 *coli* in functional metagenomic assays, they might not provide AMR functionality in their natural hosts with  
497 natural expression levels. If most of them did, we could expect to see AM-based selection and an  
498 association to drug usage, like it is observed for the AMR genes in ResFinder - a database of genes known to  
499 provide AMR to their natural hosts. This finding echoes previous sentiments that one should carefully  
500 consider the risk to human health imposed by individual AMR genes.<sup>41</sup> Some FRD genes might represent  
501 high risk, but we currently do not know what subset that is. Creating the FRD is a first step in trying to  
502 catalog the many AMR genes found in functional metagenomic studies. Screening sequenced pathogenic  
503 isolates and metagenomic assemblies for FRD genes, would be a good start for assessing their host range  
504 and risk potential.

505 The AMU data used in this study is not optimal. There is variation in drug use within each country's farms  
506 that we did not account for by using a national average and we are unable to accurately distinguish  
507 between drugs used in different livestock species. Moreover the PCU denominator used by ESVAC may vary  
508 greatly between countries with differences in livestock populations and imports/exports that contribute to  
509 the biomass as calculated. Furthermore, the integrated herds enrolled in this study might represent only a  
510 limited subset of the overall livestock production in some countries. However, even with our crude AMU  
511 estimates, we found significant associations with total AMR abundance. The similar conclusion when  
512 considering the specific drug usage profile of each country indicates that the resistome is responding to  
513 AMU. The AMR-AMU association is well-documented for specific cultured indicator species and certain AM  
514 drugs, but relatively unknown when considering the whole microbiota and resistome and the newer  
515 approach of metagenomic shotgun sequencing.<sup>3,8</sup> We do not know why the pig samples had a large within-



516 country spread of total AMR, but perhaps the more heterogeneous production system and production  
517 management is responsible.

518 DNA extractions from the pooled poultry samples resulted in relatively low DNA yields. The protocol used  
519 was optimized for pig feces, human feces and sewage, but not poultry feces.<sup>18</sup> The lower yields  
520 necessitated the use of a PCR-based library preparation kit, that can influence downstream analysis of  
521 shotgun sequencing.<sup>42</sup> While the large difference between pig and poultry resistomes in our study is likely  
522 real, we caution the use of sensitive, quantitative analyses when comparing between samples prepared  
523 using different library preparation kits. For this reason, we have mostly tested within each reservoir. For  
524 future studies, one might consider using larger volumes of bird feces or otherwise optimize the protocol to  
525 ensure PCR-free library preparation is possible for all samples.

526 The sensitivity of metagenomic approaches does not yet rival phenotypic alternatives such as selective  
527 enrichment. We relied on read-mapping as opposed to a metagenomic assembly-based strategy for greater  
528 sensitivity. Still, there are AMR genes in important pathogens that we know are likely present but are below  
529 our detection limit. For example, we only found evidence for *bla*<sub>CTX-M</sub> in three pig herds, whereas in  
530 phenotypic studies, the prevalence is high even among farms with no cephalosporin usage.<sup>43</sup> Another  
531 tradeoff with the use of reference-based read mapping is our inability to identify mutated housekeeping  
532 genes granting AMR or distinguish between close homologs of the same AMR gene, e.g., the non-ESBL  
533 *bla*<sub>TEM</sub> genes from those encoding ESBL variants.

534 The primary concern with read-mapping techniques, the lack of genomic context, can be solved using  
535 metagenomic assembly and binning approaches.<sup>16,44,45</sup> In this way, AMR alleles in full length, their genomic  
536 context and their associated taxa have been identified in both pig, poultry and human fecal samples.<sup>46</sup> As  
537 shown previously, the association between AMR and AMU is similar for metagenomics and traditional  
538 phenotypic methods, but several aspects make metagenomics an intriguing monitoring tool.<sup>17</sup> The fact that  
539 both types of analyses (quantitative, sensitive read mapping and qualitative, context-giving binning) use the  
540 same raw data, makes metagenomics an attractive tool. In addition, the digital nature of shotgun data  
541 would also allow future re-use and form the basis of an invaluable historical archive, potentially usable for  
542 both AMR and pathogen tracking worldwide. While it is possible to identify thousands of AMR genes from  
543 environmental samples using functional metagenomics, and then track them using shotgun sequencing,  
544 their association to drug use and potential risk to human and animal health requires much further work to  
545 inform effective drug policies.

546 We found that the metagenomic resistome varied significantly in livestock, with large differences between  
547 the pig and poultry reservoir, but also within each livestock species, in a country-dependent manner.  
548 Within each country, we found different levels of variation, with some countries having more homogenous  
549 herds than others. Differences were seen both in total AMR abundance, but also abundances of AMR types  
550 and specific genes, including clinically relevant AMR genes. Some of this variation, we attributed to  
551 differential drug usage between the countries. We also identified the microbiome background as an  
552 important factor in determining the resistome in livestock, but found the strength of the association was  
553 country-dependent, at least in pigs. Interestingly, we found that AMR richness in one livestock species in a  
554 country is linked to the abundance in another livestock species. Finally, we observed some indications that  
555 newly described AMR genes from functionally metagenomic studies, might not provide AMR functionality  
556 when expressed in their natural host, even though they have the potential at the right expression levels in  
557 the right organism.

## 558 **Data availability**

559 The DNA sequences (reads) from the 363 metagenomic samples from the 359 herds are deposited in the  
560 European Nucleotide Archive (ENA) under the project accession number PRJEB22062.

561

## 562 **Acknowledgements**

563 We would like to thank all the anonymous pig and poultry herd owners who agreed to participate in the  
564 study and especially everyone involved in sampling and lab work: BE: Marjolijn Schlepers. BG: Teodora  
565 Ivanova, Nikolay Cholakov, Eva Gurova-Mehmedova, Krasen Penchev. DE: Franziska Nienhaus. DK: Cecilie  
566 Liv Nielsen, Pia Ryt-Hansen, Bonnie Hølstad, Bettina Rasmussen, Kirstine Nielsen. FR: Coton Jenna, Dorenlor  
567 Virginie, Eono Florent, Eveno Eric, Le Bouquin Sophie, Leon Denis, Thomas Rodolphe. IT: Mario Gherpelli,  
568 Marco Pegoraro, Virginia Carfora. NL: Daisy de Vries. PL: Beata Gawlik, Dorota Krasucka, Andrzej Hoszowski.  
569 The EFFORT project ([www.effort-against-amr.eu](http://www.effort-against-amr.eu)) and the work presented here is supported by EU, FP7-  
570 KBBE-2013-7, grant agreement 613754.

571

572

573

574

575

## 576 **Author contributions**

577 FMA, DH, JAW, TH, DM and the EFFORT group designed the study. FMA and BEK detailed the sampling and  
578 sequencing. ASRD and the EFFORT group carried out sampling. BEK and SJP conducted the DNA purification  
579 and organized with PM the sequencing. RBH, OL and TNP created the read-mapping pipeline. ER created  
580 the functional resistome database. PM, OL, RECL, LC, LAMS, HS, AB and HV carried out the bioinformatics  
581 and statistical analysis. PM created the figures and drafted the manuscript. All authors helped review, edit  
582 and complete the manuscript.

583

## 584 **Competing interests**

585 The authors declare no competing financial interests.

## 586 **References**

587

- 588 1. Who. ANTIMICROBIAL RESISTANCE Global Report on Surveillance 2014. *World Heal. Organ.* (2014).
- 589 2. Aarestrup, F. M. The livestock reservoir for antimicrobial resistance: a personal view on changing  
590 patterns of risks, effects of interventions and the way forward. *Philos. Trans. R. Soc. Lond. B. Biol.*  
591 *Sci.* **370**, 20140085 (2015).
- 592 3. Chantziaras, I., Boyen, F., Callens, B. & Dewulf, J. Correlation between veterinary antimicrobial use  
593 and antimicrobial resistance in food-producing animals: A report on seven countries. *J. Antimicrob.*  
594 *Chemother.* **69**, 827–834 (2014).
- 595 4. Dunlop, R. H. *et al.* Associations among antimicrobial drug treatments and antimicrobial resistance  
596 of fecal *Escherichia coli* of swine on 34 farrow-to-finish farms in Ontario, Canada. *Prev. Vet. Med.* **34**,  
597 283–305 (1998).
- 598 5. Aarestrup, F. M., Seyfarth, A. M., Emborg, H., Pedersen, K. & Bager, F. Effect of Abolishment of the  
599 Use of Antimicrobial Agents for Growth Promotion on Occurrence of Antimicrobial Resistance in  
600 Fecal Enterococci from Food Animals in Denmark. *Antimicrob. Agents Chemother* **45**, 2054–2059  
601 (2001).
- 602 6. Agersø, Y. & Aarestrup, F. M. Voluntary ban on cephalosporin use in Danish pig production has  
603 effectively reduced extended-spectrum cephalosporinase-producing *Escherichia coli* in slaughter  
604 pigs. *J. Antimicrob. Chemother.* **68**, 569–72 (2013).

- 605 7. Dutil, L. *et al.* Ceftiofur resistance in *Salmonella enterica* serovar Heidelberg from chicken meat and  
606 humans, Canada. *Emerg. Infect. Dis.* **16**, 48–54 (2010).
- 607 8. Dorado-García, A. *et al.* Quantitative assessment of antimicrobial resistance in livestock during the  
608 course of a nationwide antimicrobial use reduction in the Netherlands. *J. Antimicrob. Chemother.*  
609 dkw308 (2016). doi:10.1093/jac/dkw308
- 610 9. Aarestrup, F. M. *et al.* Resistance to antimicrobial agents used for animal therapy in pathogenic-,  
611 zoonotic- and indicator bacteria isolated from different food animals in Denmark: a baseline study  
612 for the Danish Integrated Antimicrobial Resistance Monitoring Programme (DANMAP). *APMIS* **106**,  
613 745–770 (1998).
- 614 10. Bronzwaer, S. Harmonised monitoring of antimicrobial resistance in *Salmonella* and *Campylobacter*  
615 isolates from food animals in the European Union. *Clin. Microbiol. Infect.* **14**, 522–533 (2008).
- 616 11. McEwan, S. A., Aarestrup, F. M. & Jordan, D. in *Antimicrobial resistance in bacteria of animal origin*  
617 397–413 (ASM Press, 2006).
- 618 12. Veterinary Medicines Division. European Medicines Agency, European Surveillance of Veterinary  
619 Antimicrobial Consumption, 2014. (2016).
- 620 13. ECDC. EFSA. ENA. ECDC/EFSA/EMA first joint report on the integrated analysis of the consumption of  
621 antimicrobial agents and occurrence of antimicrobial resistance in bacteria from humans and food-  
622 producing animals. *EFSA J.* **13**, 4006 (2015).
- 623 14. EFSA. Technical specifications on the harmonised monitoring and reporting of antimicrobial  
624 resistance in *Salmonella*, *Campylobacter* and indicator *Escherichia coli* and *Enterococcus* spp .  
625 bacteria transmitted through food 1. *EFSA J.* **10**, 64 (2012).
- 626 15. Nordahl Petersen, T. *et al.* Meta-genomic analysis of toilet waste from long distance flights; a step  
627 towards global surveillance of infectious diseases and antimicrobial resistance. *Sci. Rep.* **5**, 11444  
628 (2015).
- 629 16. Xiao, L. *et al.* A reference gene catalogue of the pig gut microbiome. *Nat. Microbiol.* **1**, 16161 (2016).
- 630 17. Munk, P. *et al.* A sampling and metagenomic sequencing-based methodology for monitoring  
631 antimicrobial resistance in swine herds. *J. Antimicrob. Chemother.* dkw415 (2016).  
632 doi:10.1093/jac/dkw415

- 633 18. Knudsen, B. E. *et al.* Impact of Sample Type and DNA Isolation Procedure on Genomic Inference of  
634 Microbiome Composition. *mSystems* **1**, 64394 (2016).
- 635 19. Li, H. & Durbin, R. Fast and accurate short read alignment with Burrows-Wheeler transform.  
636 *Bioinformatics* **25**, 1754–1760 (2009).
- 637 20. Zankari, E. *et al.* Identification of acquired antimicrobial resistance genes. *J. Antimicrob. Chemother.*  
638 **67**, 2640–2644 (2012).
- 639 21. Trapnell, C. *et al.* Differential gene and transcript expression analysis of RNA-seq experiments with  
640 TopHat and Cufflinks. *Nat. Protoc.* **7**, 562–78 (2012).
- 641 22. Fu, L., Niu, B., Zhu, Z., Wu, S. & Li, W. CD-HIT: Accelerated for clustering the next-generation  
642 sequencing data. *Bioinformatics* **28**, 3150–3152 (2012).
- 643 23. Pehrsson, E. C., Forsberg, K. J., Gibson, M. K., Ahmadi, S. & Dantas, G. Novel resistance functions  
644 uncovered using functional metagenomic investigations of resistance reservoirs. *Front. Microbiol.* **4**,  
645 1–11 (2013).
- 646 24. Moore, A. M. *et al.* Pediatric fecal microbiota harbor diverse and novel antibiotic resistance genes.  
647 *PLoS One* **8**, (2013).
- 648 25. Sommer, M. O. a, Dantas, G. & Church, G. M. Functional characterization of the antibiotic resistance  
649 reservoir in the human microflora. *Science* **325**, 1128–31 (2009).
- 650 26. Forsberg, K. J. *et al.* Bacterial phylogeny structures soil resistomes across habitats. *Nature* **509**, 612–  
651 6 (2014).
- 652 27. Legendre, P. & Gallagher, E. D. Ecologically meaningful transformations for ordination of species  
653 data. *Oecologia* **129**, 271–280 (2001).
- 654 28. Veterinary Medicines Division. European Medicines Agency, European Surveillance of Veterinary  
655 Antimicrobial Consumption, 2016. (2016).
- 656 29. Jari Oksanen, F. Guillaume Blanchet, Michael Friendly, Roeland Kindt, Pierre Legendre, D., McGlinn,  
657 Peter R. Minchin, R. B. O’Hara, Gavin L. Simpson, Peter Solymos, M. H. H. & Stevens. *vegan*:  
658 Community Ecology Package. (2016).
- 659 30. Pielou, E. C. The measurement of diversity in different types of biological collections. *J. Theor. Biol.*

- 660           **13**, 131–144 (1966).
- 661   31.   Paradis, E., Claude, J. & Strimmer, K. APE: Analyses of phylogenetics and evolution in R language.  
662           *Bioinformatics* **20**, 289–290 (2004).
- 663   32.   Letunic, I. & Bork, P. Interactive Tree Of Life (iTOL): An online tool for phylogenetic tree display and  
664           annotation. *Bioinformatics* **23**, 127–128 (2007).
- 665   33.   Wickham, H. *ggplot2: Elegant Graphics for Data Analysis*. (Springer-Verlag New York, 2009).
- 666   34.   Bates, D., Mächler, M., Bolker, B. & Walker, S. Fitting Linear Mixed-Effects Models using lme4. *eprint*  
667           *arXiv:1406.5823* **67**, 51 (2014).
- 668   35.   Love, M. I., Huber, W. & Anders, S. Moderated estimation of fold change and dispersion for RNA-seq  
669           data with DESeq2. *Genome Biol.* **15**, 550 (2014).
- 670   36.   McMurdie, P. J. & Holmes, S. Waste not, want not: why rarefying microbiome data is inadmissible.  
671           *PLoS Comput. Biol.* **10**, e1003531 (2014).
- 672   37.   Hochberg, Y. & Benjamini, Y. Controlling the False Discovery Rate : a Practical and Powerful  
673           Approach to Multiple Testing. **57**, 289–300 (1995).
- 674   38.   H Hasman, AM Hammerum , F Hansen , RS Hendriksen, B Olesen, Y Agersø, E Zankari, P  
675           Leekitcharoenphon, M Stegger , RS Kaas, LM Cavaco, DS Hansen, FM Aarestrup, R. S. Detection of  
676           Mcr-1 Encoding Plasmid-Mediated Colistin-Resistant Escherichia Coli Isolates From Human  
677           Bloodstream Infection and Imported Chicken Meat, Denmark 2015. *Euro surveill* **20**, pii=30085  
678           (2015).
- 679   39.   Wang, Y. *et al.* A novel gene, *optrA*, that confers transferable resistance to oxazolidinones and  
680           phenicols and its presence in *Enterococcus faecalis* and *Enterococcus faecium* of human and animal  
681           origin. *J. Antimicrob. Chemother.* **70**, 2182–2190 (2015).
- 682   40.   Sun, M. *et al.* Interconnected microbiomes and resistomes in low-income human habitats SI. *Nat. SI*  
683           **61**, 5985–5991 (2016).
- 684   41.   Martínez, J. L., Coque, T. M. & Baquero, F. What is a resistance gene ? Ranking risk in resistomes.  
685           *Nat. Publ. Gr.* **13**, 116–123 (2014).
- 686   42.   Bowers, R. M. *et al.* Impact of library preparation protocols and template quantity on the

- 687 metagenomic reconstruction of a mock microbial community. *BMC Genomics* **16**, 856 (2015).
- 688 43. Hammerum, A. M. *et al.* Characterization of extended-spectrum  $\beta$ -lactamase (ESBL)-producing  
689 *Escherichia coli* obtained from Danish pigs, pig farmers and their families from farms with high or no  
690 consumption of third- or fourth-generation cephalosporins. *J. Antimicrob. Chemother.* 1–8 (2014).  
691 doi:10.1093/jac/dku180
- 692 44. Nielsen, H. B. *et al.* Identification and assembly of genomes and genetic elements in complex  
693 metagenomic samples without using reference genomes. *Nat. Biotechnol.* **32**, (2014).
- 694 45. Anantharaman, K. *et al.* Thousands of microbial genomes shed light on interconnected  
695 biogeochemical processes in an aquifer system. *Nat. Commun.* **7**, 1–11 (2016).
- 696 46. Ma, L. *et al.* Metagenomic Assembly Reveals Hosts of Antibiotic Resistance Genes and the Shared  
697 Resistome in Pig, Chicken, and Human Feces. *Environ. Sci. Technol.* **50**, 420–427 (2016).
- 698
